# Supplementary material
Source: bioRxiv or medRxiv preprint supplement (https://medrxiv.org/highwire/filestream/78826/field_highwire_adjunct_files/1/2020.04.29.20083972-2.pdf)

Supplementary Figure S1. Mean levels of selected proteins at baseline and after 12 weeks by treatment group (oral magnesium supplementation vs placebo). Error bars represent 95% confidence intervals.

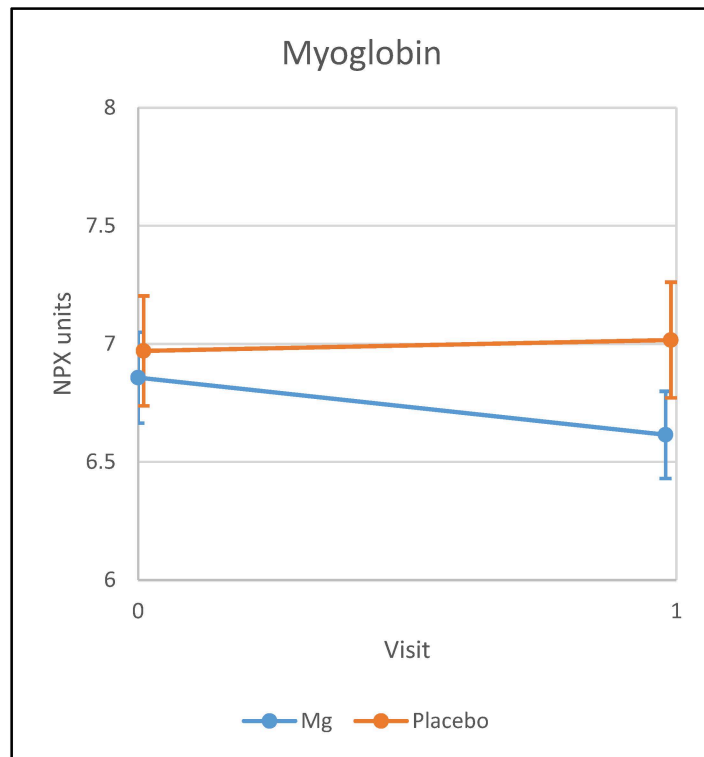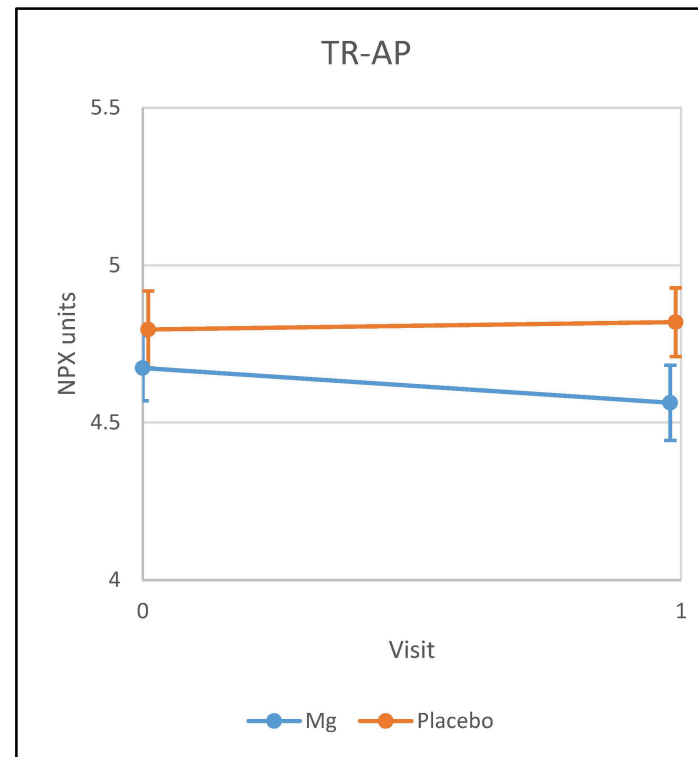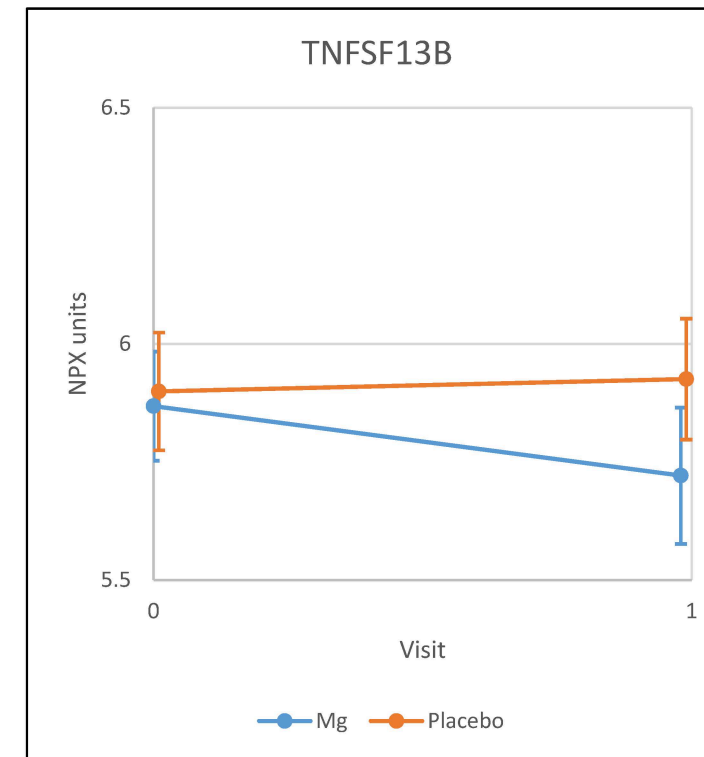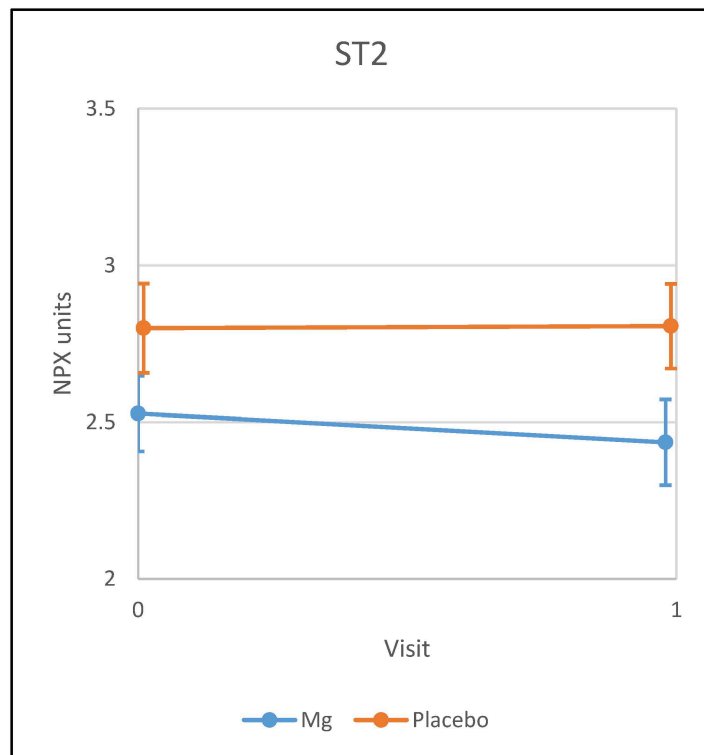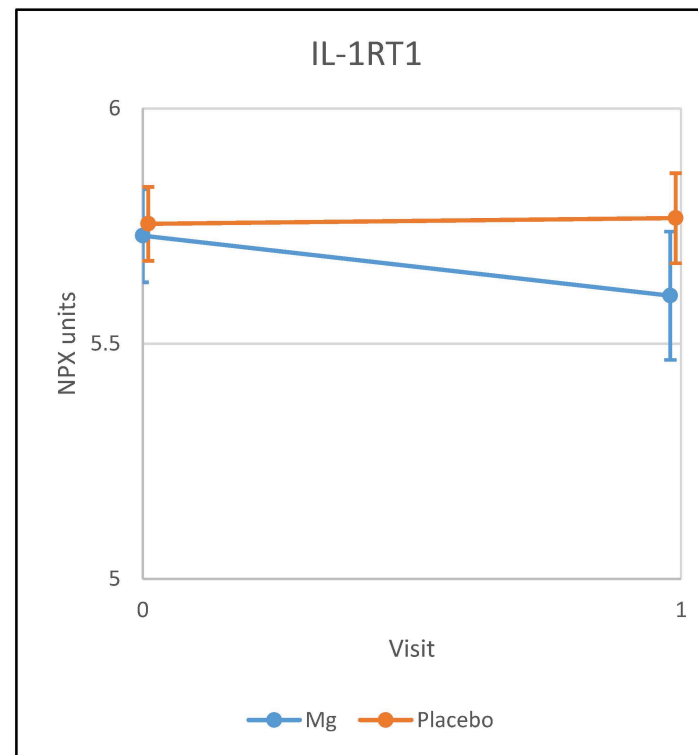

Supplement: Supplementary file [file 2020.04.29.20083972-2.pdf]
